# Supplementary material
Source: publisher figshare collection journal article supplement (https://tandf.figshare.com/articles/dataset/_/5119684)
Supplement: Supplementary file 2 [file 1]

| Effect of inlet-window opening area on the indoor surface temperature (Case study building-1) |                                                                                                                                |                                                                                    |
|-----------------------------------------------------------------------------------------------|--------------------------------------------------------------------------------------------------------------------------------|------------------------------------------------------------------------------------|
|                                                                                               | Photo                                                                                                                          | Thermal Image                                                                      |
| With 45% effective inlets                                                                     | <br>Image taken at 12:20 on 1 September 2015  |   |
| With 0% effective inlets                                                                      | <br>Image taken at 12:24 on 1 September 2015  |   |
| With 30% effective inlets                                                                     | <br>Image taken at 12:30 on 1 September 2015  |   |
| With 5% effective inlets                                                                      | <br>Image taken at 12:45 on 1 September 2015 |  |

| Effect of inlet-window opening area on the indoor surface temperature (Case study building-3) |                                                                                                                             |                                                                                                                                     |
|-----------------------------------------------------------------------------------------------|-----------------------------------------------------------------------------------------------------------------------------|-------------------------------------------------------------------------------------------------------------------------------------|
|                                                                                               | Photo                                                                                                                       | Thermal Image                                                                                                                       |
| With 45% effective inlets                                                                     | <br>Image taken at 10:22 on 24 Aug 2015  | <br>Thermal image taken at 10:22 on 24 Aug 2015  |
| With 5% effective inlets                                                                      | <br>Image taken at 10:40 on 24 Aug 2015  | <br>Thermal image taken at 10:40 on 24 Aug 2015  |
| With 30% effective inlets                                                                     | <br>Image taken at 10:58 on 24 Aug 2015 | <br>Thermal image taken at 10:58 on 24 Aug 2015 |
