# Supplementary material
Source: publisher figshare collection journal article supplement (https://tandf.figshare.com/articles/dataset/_/5119684)
Supplement: Supplementary file 3 [file 1]

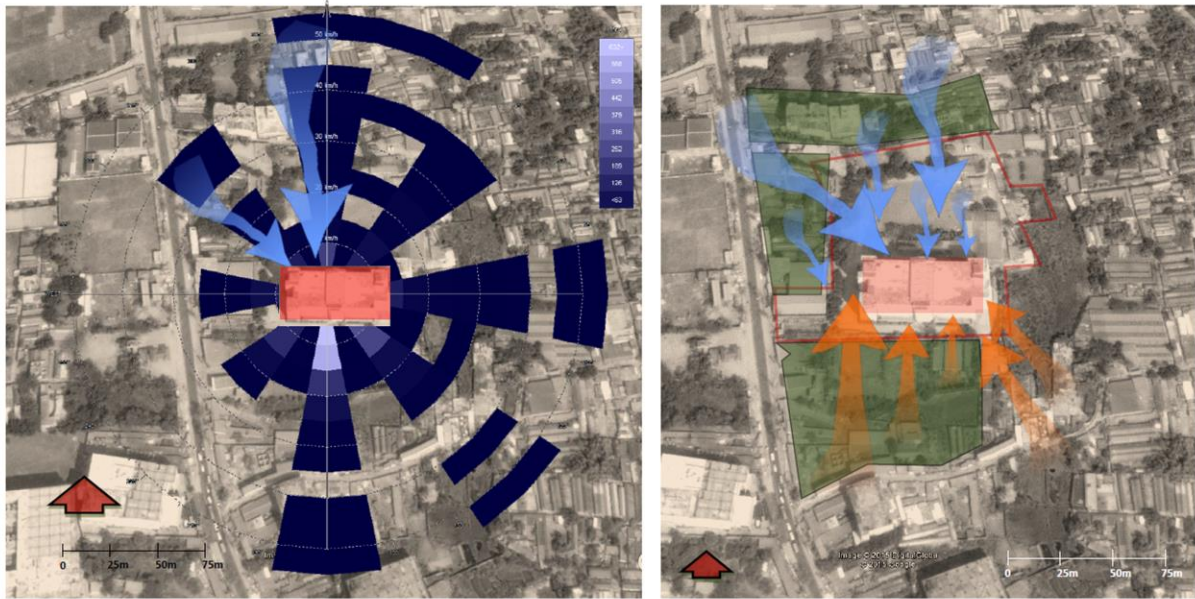

Figure: Average wind regime around the case study building-3

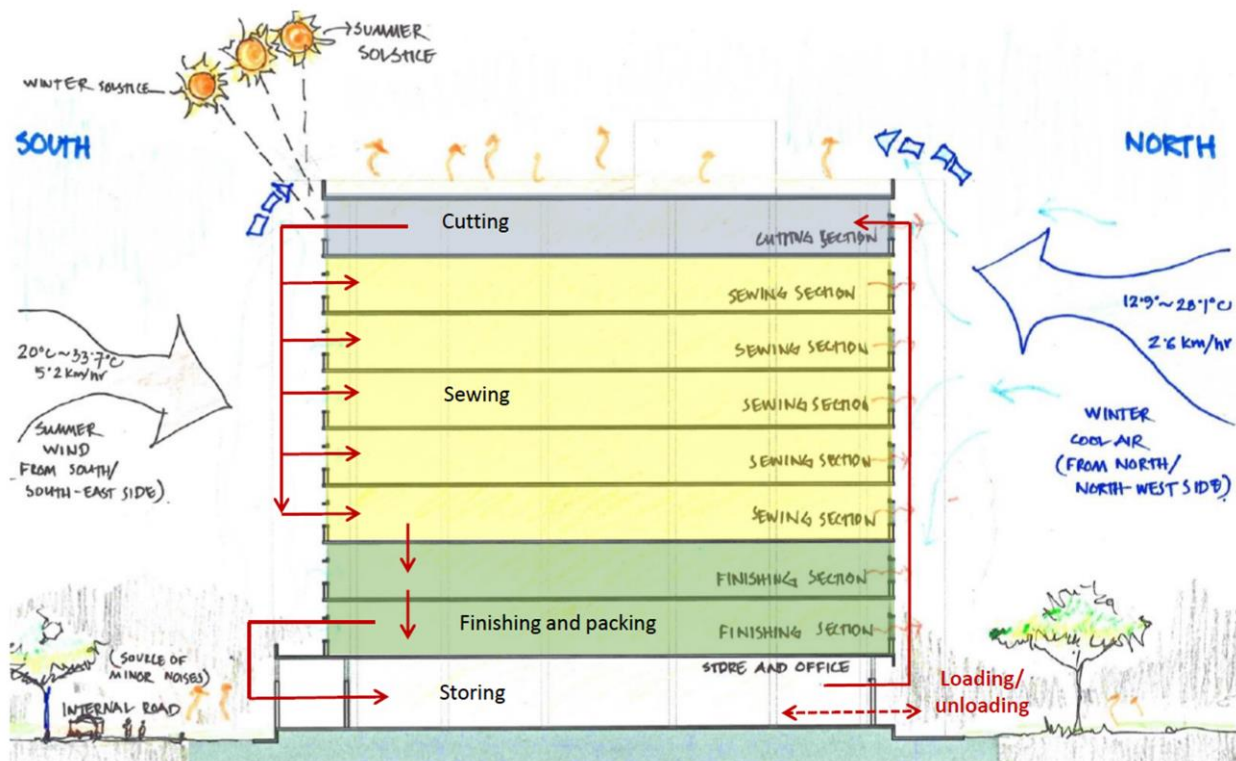

Figure: Location of the production spaces and activity flow in case study building-3
